# Supplementary material
Source: MDPI journal article supplement (https://www.mdpi.com/2076-3417/13/4/2310)

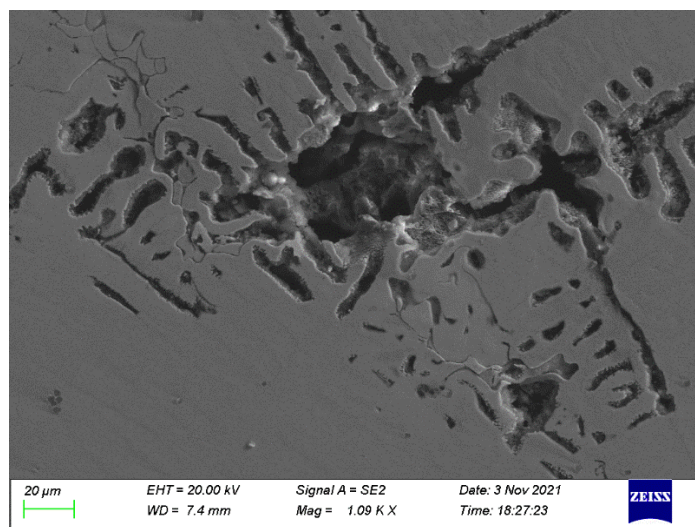

**Figure S1.** Pitting corrosion in the dendritic region of low-density stainless steel.

Supplement: s1 [file s1]
